# Supplementary material
Source: publisher figshare collection journal article supplement (https://gsajournals.figshare.com/articles/dataset/_/12724943)
Supplement: Supplementary file [file 1]

Group AT HW IL

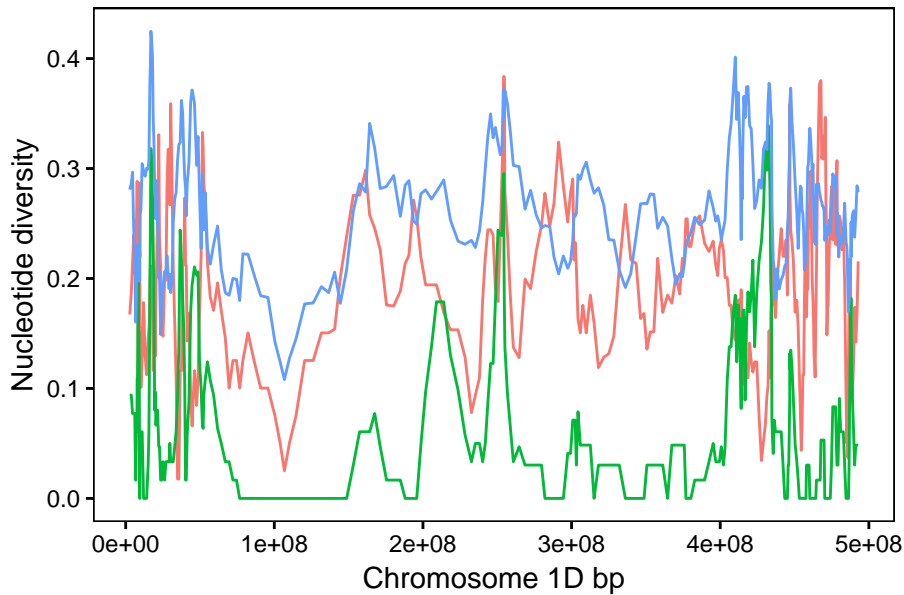

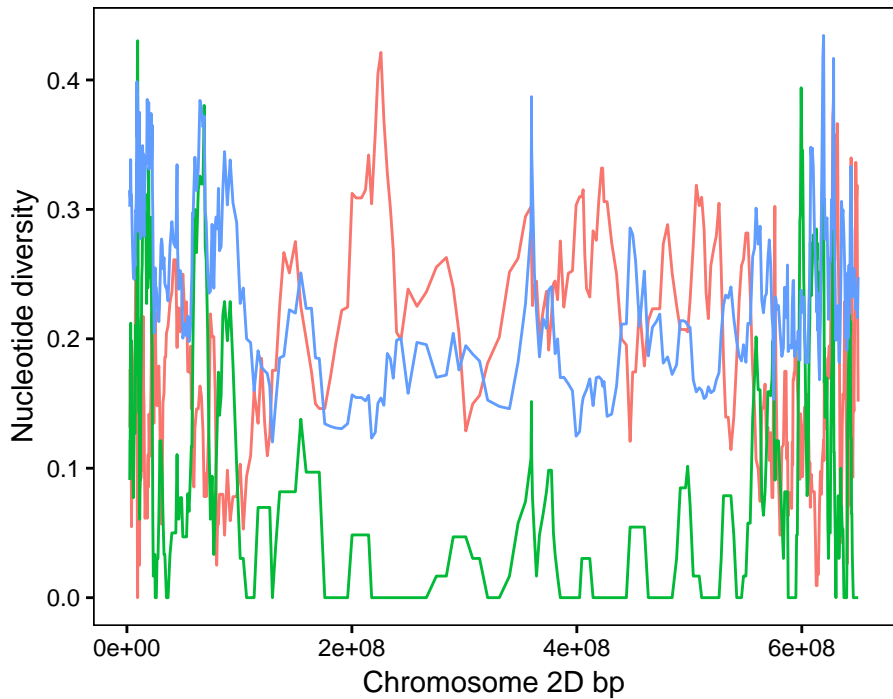

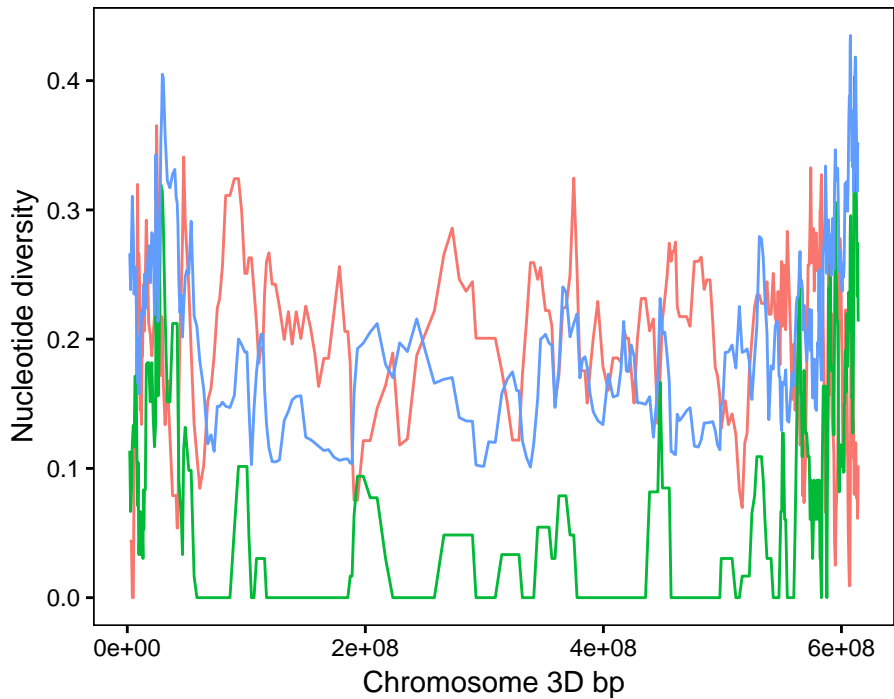

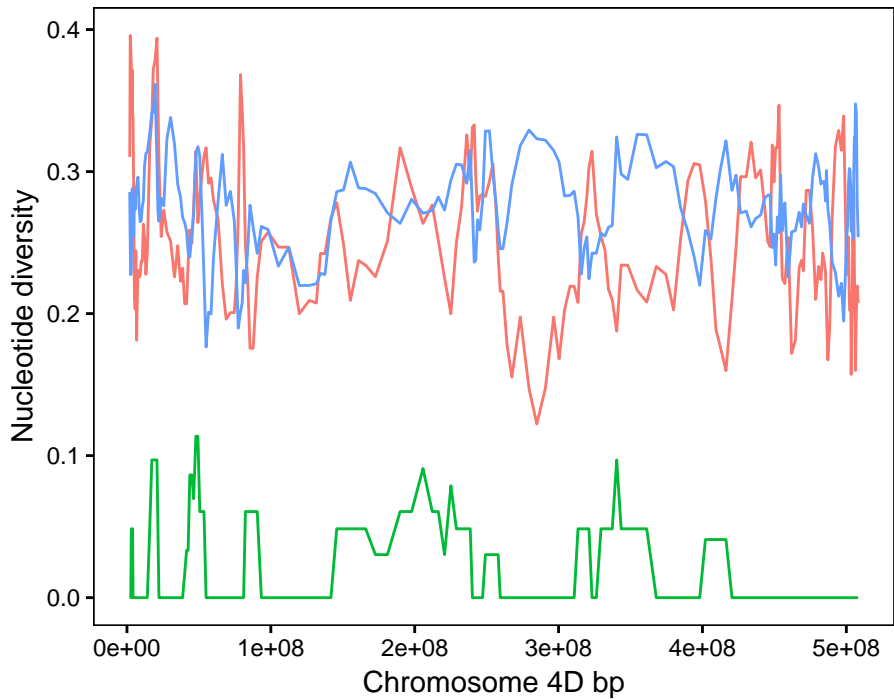

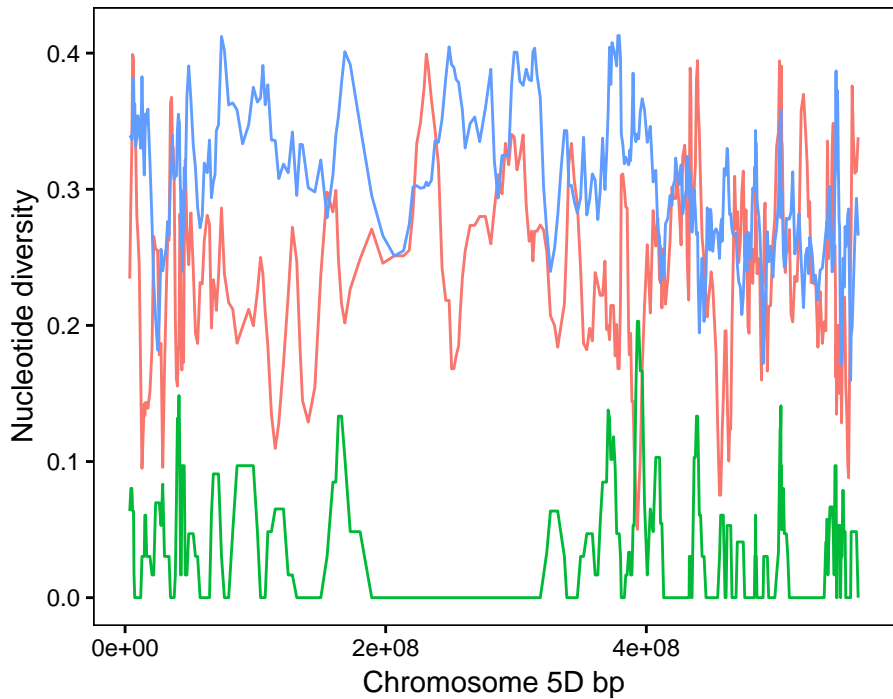

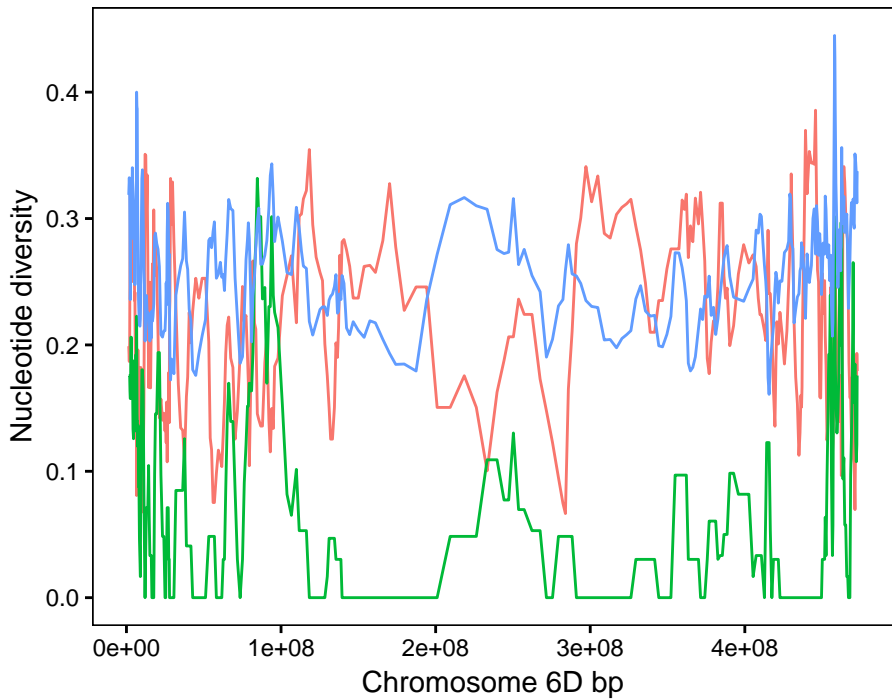

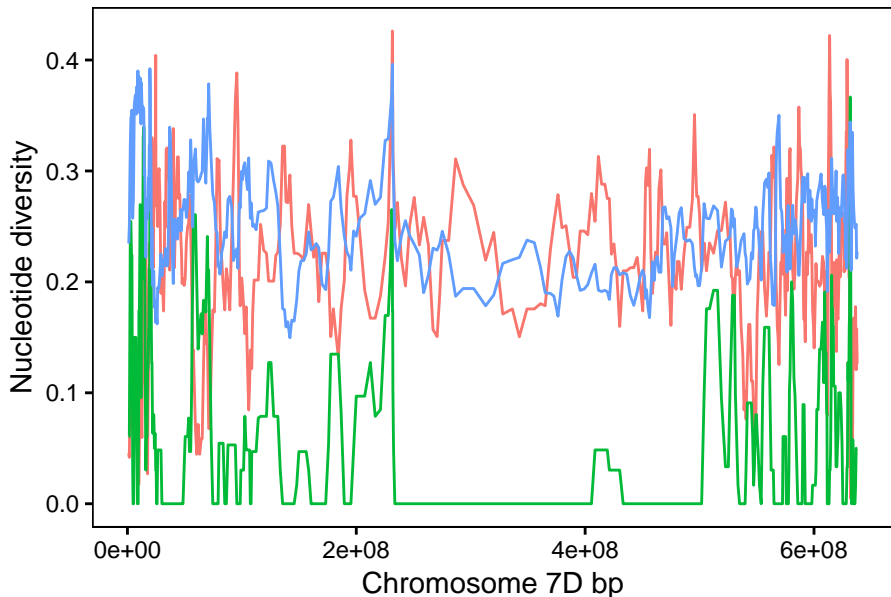

Fig. S3. Variation in nucleotide diversity per chromosome based on SNP pi values for *Ae. tauschii* (AT) accessions, hexaploid wheat (HW) and introgression lines (IL).
